# Supplementary material
Source: PubMed Central journal article supplement (PMC4966849)
Supplement: kmab-08-03-1134408-s001.pdf [file kmab-08-03-1134408-s001.pdf]

## Supplementary Information

### **Microscale Screening of Antibody Libraries as Maytansinoid Antibody-Drug Conjugates**

Kalli C. Catcott<sup>1</sup>, Molly A. McShea<sup>1</sup>, Carl Uli Bialucha<sup>2\*</sup>, Kathy L. Miller<sup>3</sup>, Stuart W. Hicks<sup>1</sup>,  
Parmita Saxena<sup>2</sup>, Thomas G. Gesner<sup>2</sup>, Mikias Woldegiorgis<sup>3</sup>, Megan E. Lewis<sup>1</sup>, Chen Bai<sup>1</sup>,  
Michael S. Fleming<sup>1</sup>, Seth A. Ettenberg<sup>2, 4</sup>, Hans K. Erickson<sup>1, 5</sup>, Nicholas C. Yoder<sup>1,\*</sup>

<sup>1</sup>ImmunoGen, Inc.; Waltham, MA; <sup>2</sup>Novartis Institutes for Biomedical Research; Cambridge, MA; <sup>3</sup>Novartis Institutes for Biomedical Research; Emeryville, CA; <sup>4</sup>Current address: Unum Therapeutics; Cambridge, MA; <sup>5</sup>Current address: Genentech; South San Francisco, CA.

\*Correspondence to: Nicholas C. Yoder; Email: [nicholas.yoder@immunogen.com](mailto:nicholas.yoder@immunogen.com); Carl Uli Bialucha: [carl\\_uli.bialucha@novartis.com](mailto:carl_uli.bialucha@novartis.com).

Fig. S1A. Comparison of SE-HPLC and SE-UPLC (ADC #1)

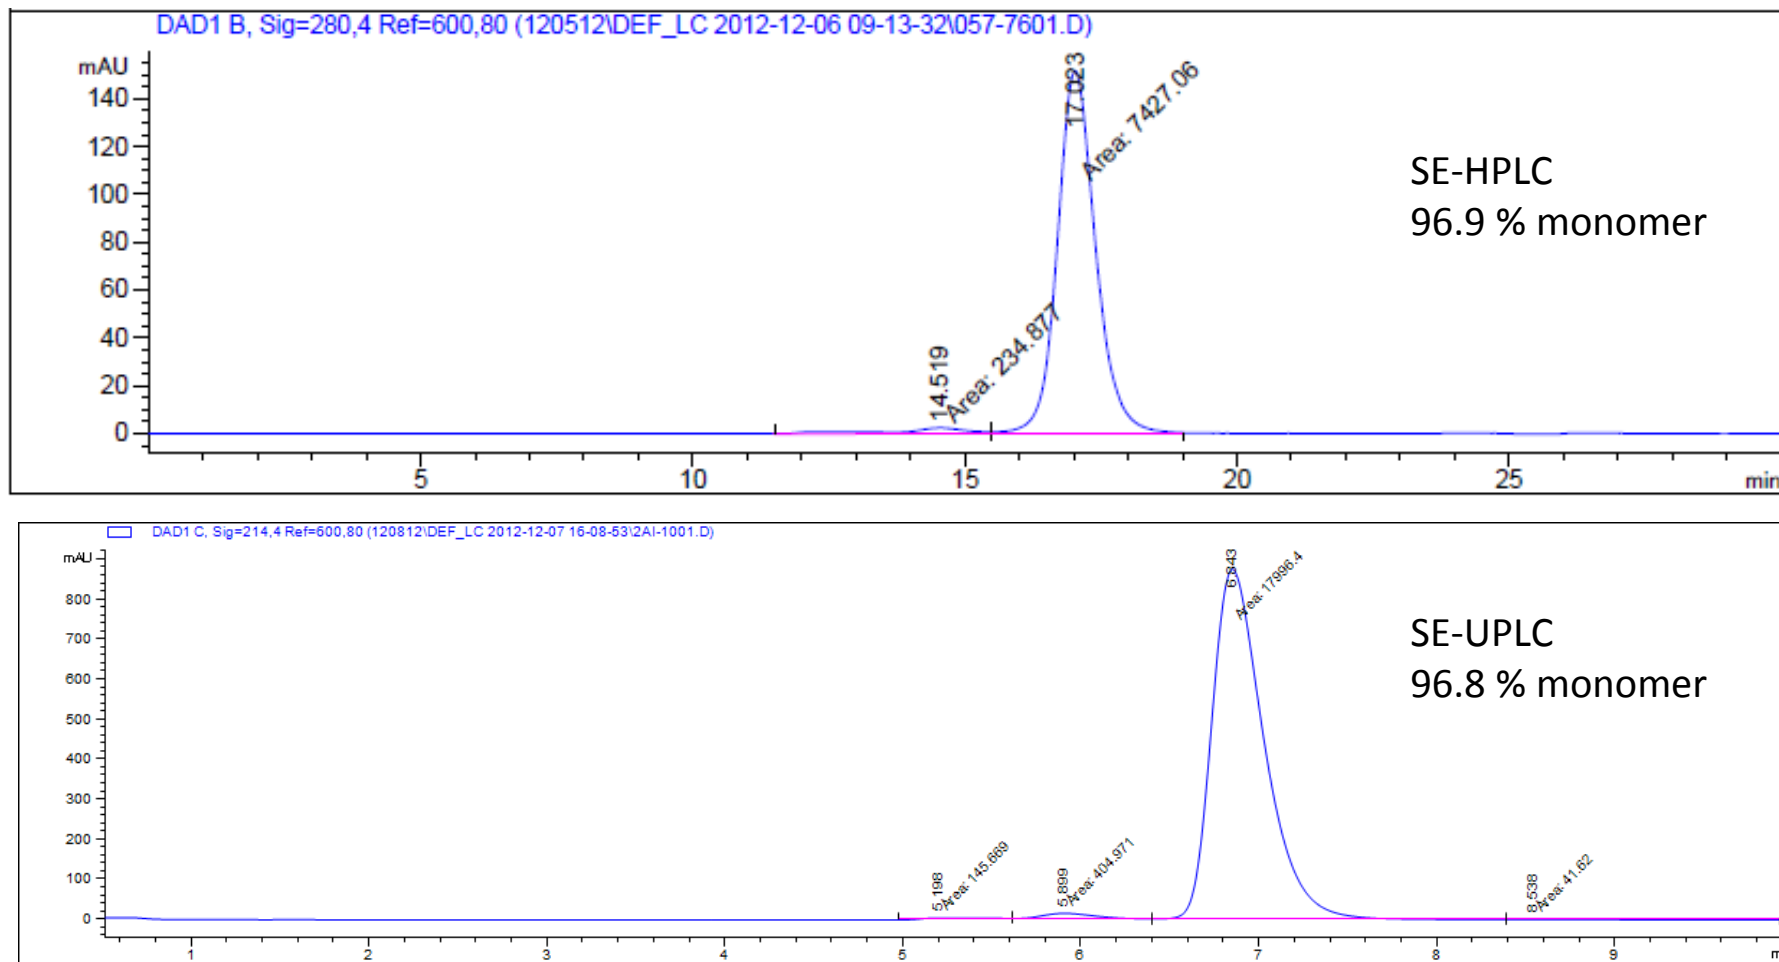

Figure S1A,B. Matched chromatograms showing the same maytansinoid ADC analyzed using SE-HPLC and SE-UPLC methods.

# Figure S1B. Comparison of SE-HPLC and SE-UPLC (ADC #2)

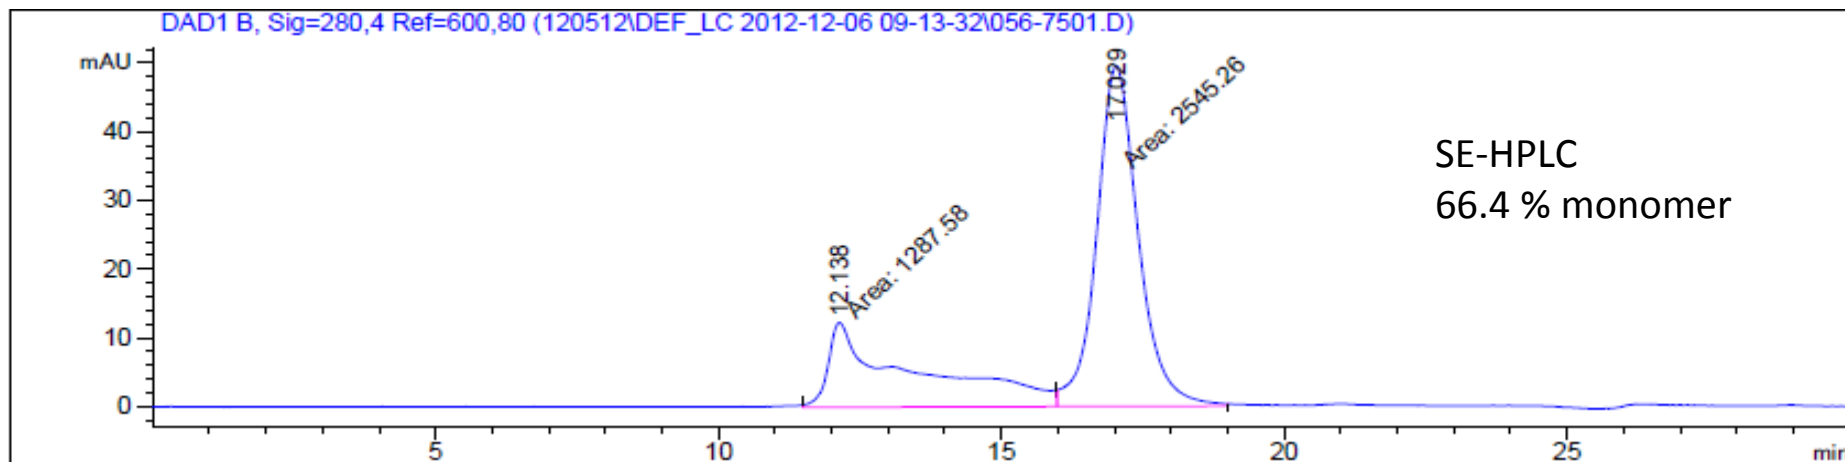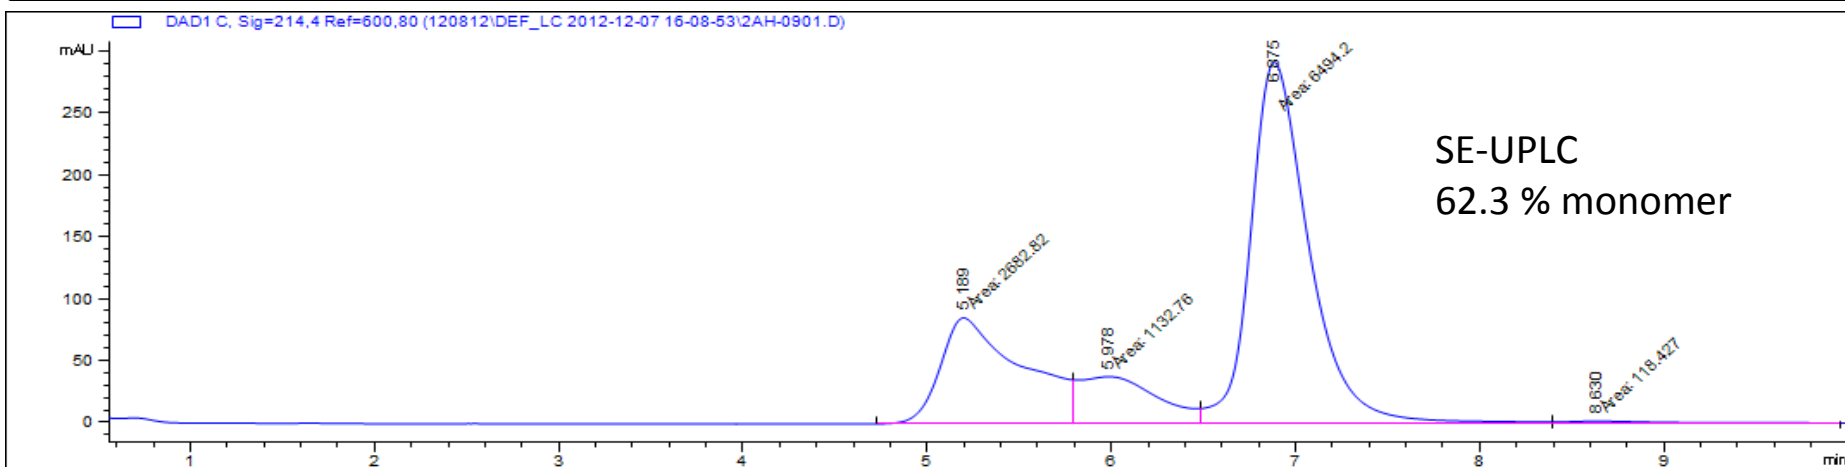

Figure S1C. Comparability of DAR, % monomer, concentration measurements using different analytical methods

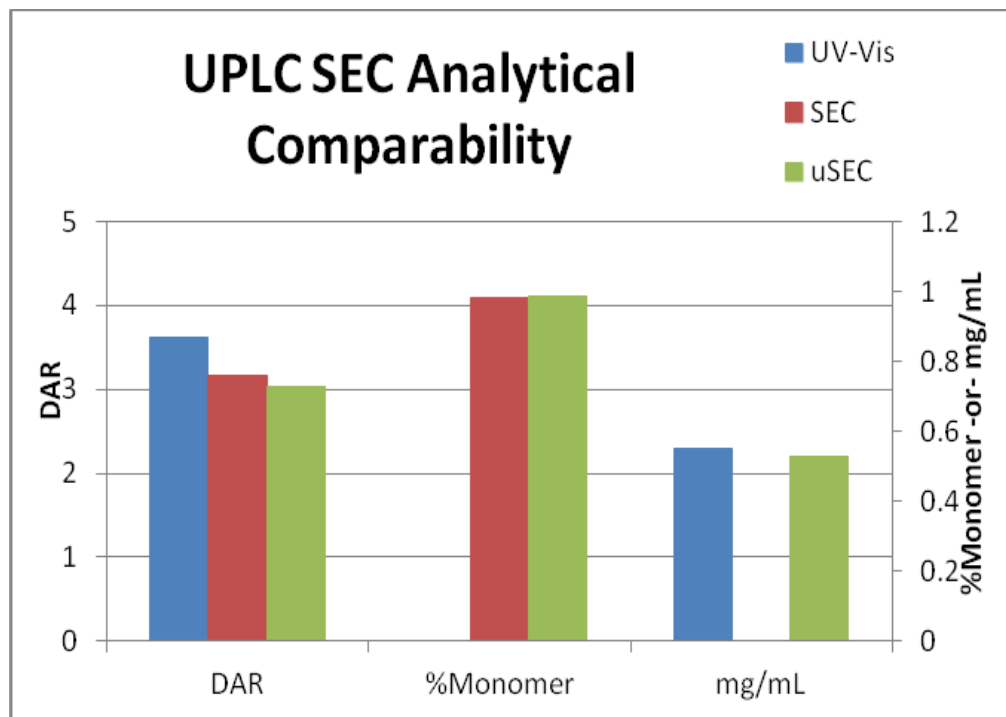

**Figure S1C.** Example comparison of DAR, % monomer, and concentration measurements made by the conventional combination of UV-Vis/SE-HPLC, and by SE-UPLC.

Figure S2. Biochemical analysis of free drug removal

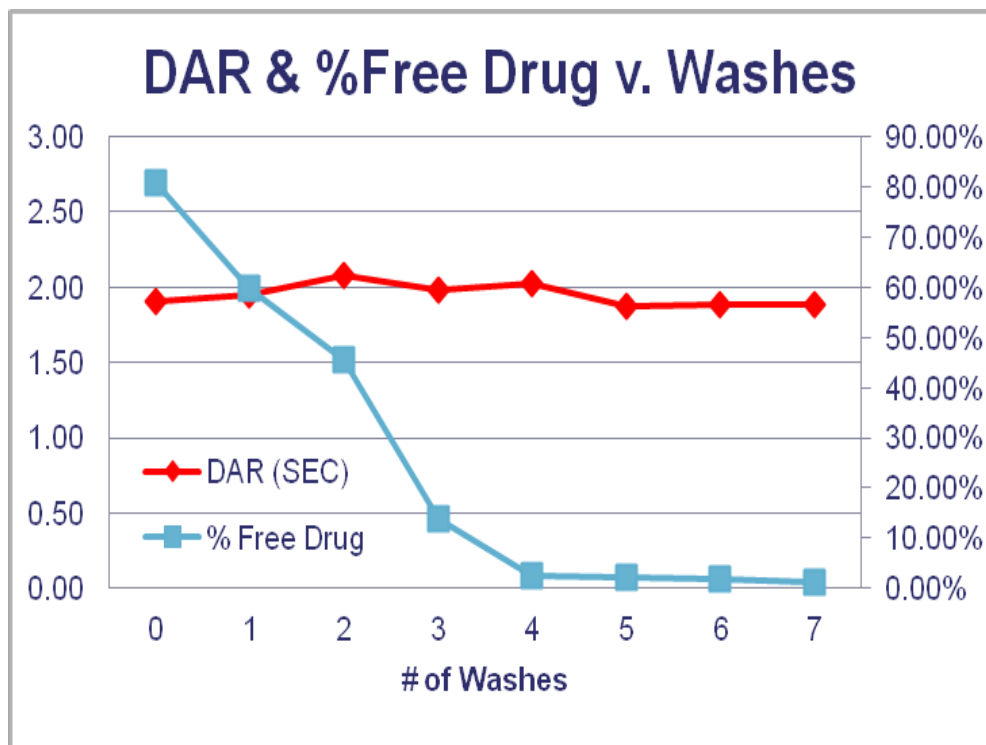

**Figure S2.** Removal of free maytansinoid species as a function of washes with 96 well ultrafiltration plates. Identical conjugates were prepared in parallel as described and then, after the indicated number of washes, assayed for free maytansinoid using a previously described mixed-mode HPLC assay {Fleming, 2005 #166}. ADC from four wells was combined to provide enough material for the free drug assay.

# Figure S3: Effect of DAR of ML66 ADCs on cytotoxicity against MDA-MB-483 cells

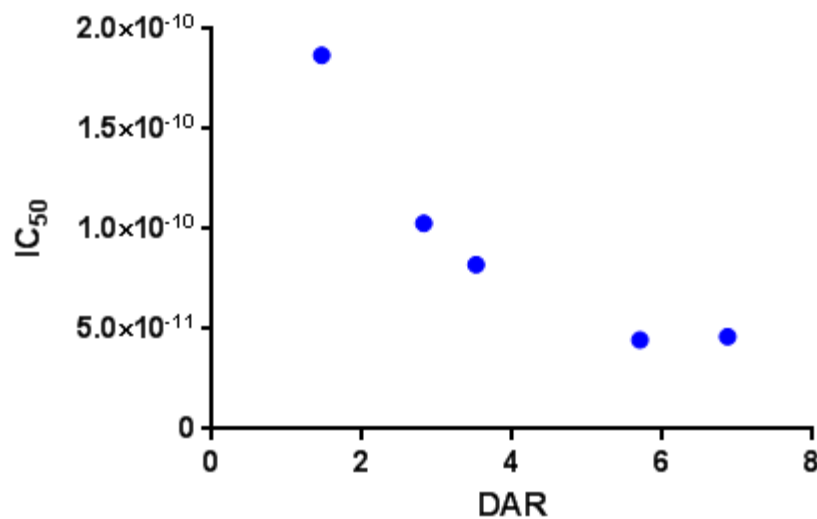

**Figure S3.** IC<sub>50</sub> values for the variable DAR ML66 ADCs plotted against the DAR values.

Figure S4. Scatter plot comparing potency of research and microscale anti-[Antigen B] ADCs

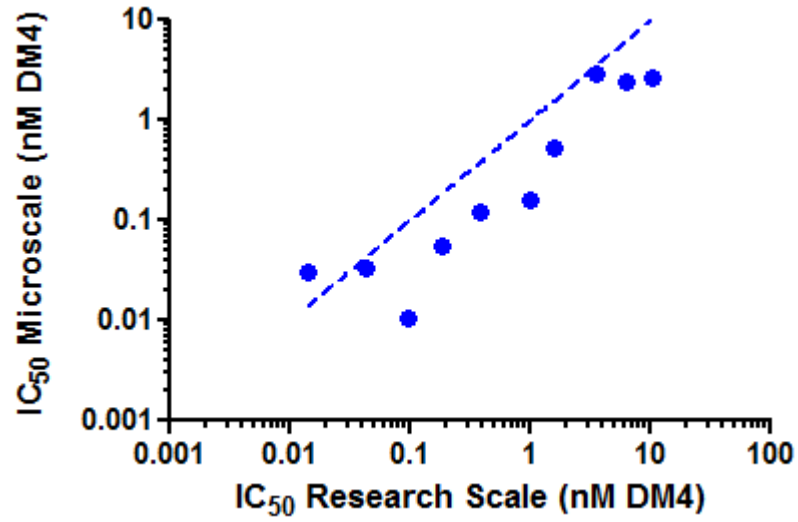

**Figure S4.** Same data as in Figure 6A, graphed as a linear correlation. The dashed line in this figure shows  $y = x$ .

# Figure S5A: ADCs retain binding affinity of input antibody (scatter plot)

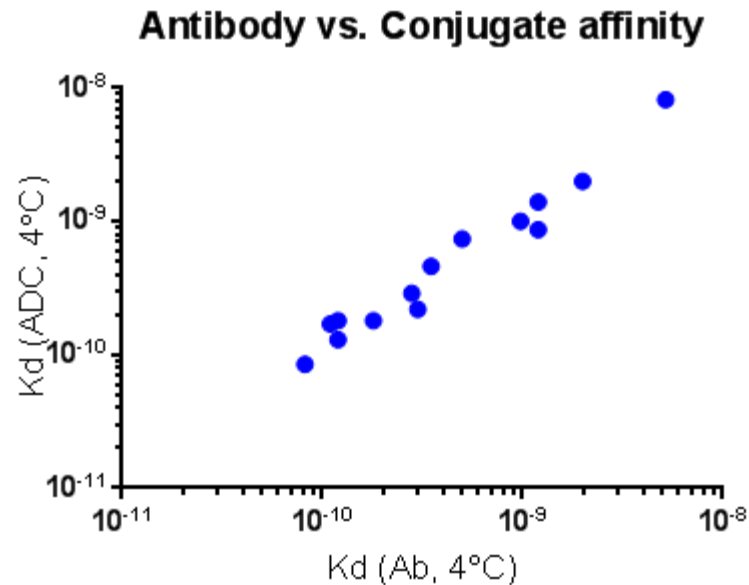

**Figure S5.** Correlation between binding affinity of 15 murine Abs and the corresponding SMCC-DM1 ADCs, depicted as (A) a scatter plot; or (B) a Bland-Altman plot.



Figure S5B: ADCs retain binding affinity of input antibody (Bland-Altman plot)

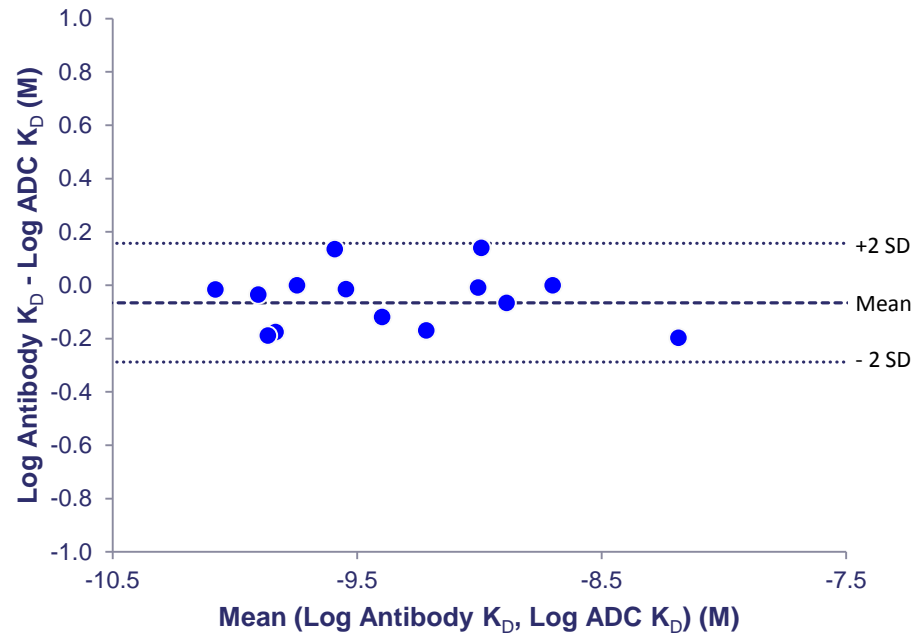

**Table S1.** Comparison of DAR values measured by different methods (SMCC-DM1 ADCs). The average of the absolute value of the percentage differences is 4%.

| SE-UPLC | UV-vis | % Difference |
|---------|--------|--------------|
| 3.1     | 3.2    | -4%          |
| 3.1     | 3.3    | -5%          |
| 2.9     | 3.1    | -5%          |
| 2.2     | 2.1    | 5%           |
| 2.0     | 1.9    | 4%           |
| 1.9     | 2.0    | -1%          |

**Table S2.** Comparison of concentration measurements of SMCC-DM1 ADCs made by different methods. The average of the absolute value of the percentage differences is 9%.

| Concentration (mg Ab/mL) |        |       |
|--------------------------|--------|-------|
| SE-UPLC                  | UV-vis | %Diff |
| 0.51                     | 0.61   | -21%  |
| 0.37                     | 0.31   | 16%   |
| 0.50                     | 0.50   | 0%    |
| 0.24                     | 0.23   | 3%    |
| 0.55                     | 0.60   | -10%  |
| 0.53                     | 0.55   | -5%   |

**Table S3.** Summary of the Antigen B conjugation campaign with SPDB-DM4. For this campaign, replicate conjugates were combined prior to analysis. The column “Comparison Assay” notes whether this particular ADC was included in the experiment summarized in Figure 6.

| Antibody | Yield | DAR | % Monomer | Concentration (mg/mL ADC) | Comparison Assay |
|----------|-------|-----|-----------|---------------------------|------------------|
| B1       | 25%   | 2.6 | 96%       | 0.25                      | N                |
| B2       | 65%   | 3.7 | 98%       | 0.65                      | Y                |
| B3       | 22%   | 2.7 | 95%       | 0.22                      | N                |
| B4       | 12%   | 3.1 | 99%       | 0.12                      | Y                |
| B5       | 73%   | 2.9 | 96%       | 0.73                      | N                |
| B6       | 31%   | 3.0 | 74%       | 0.31                      | N                |
| B7       | 53%   | 2.9 | 98%       | 0.53                      | Y                |
| B8       | 59%   | 2.9 | 96%       | 0.59                      | Y                |
| B9       | 65%   | 2.9 | 96%       | 0.65                      | Y                |
| B10      | 22%   | 2.7 | 97%       | 0.22                      | Y                |
| B11      | 35%   | 2.6 | 62%       | 0.35                      | N                |
| B12      | 61%   | 2.9 | 96%       | 0.61                      | Y                |
| B13      | 46%   | 2.8 | 87%       | 0.46                      | N                |
| B14      | 61%   | 2.9 | 97%       | 0.61                      | N                |
| B15      | 80%   | 3.1 | 98%       | 0.80                      | Y                |
| B16      | 42%   | 3.1 | 97%       | 0.42                      | N                |

|     |     |     |      |      |   |
|-----|-----|-----|------|------|---|
| B17 | 73% | 3.2 | 96%  | 0.73 | Y |
| B18 | 75% | 3.6 | 97%  | 0.75 | Y |
| B19 | 2%  | 4.7 | 100% | 0.01 | N |

**Table S4.** Summaries of the Antigen C conjugation campaign. For this campaign, replicate conjugates were combined before analysis.

(A) Characterization data for the entire set of ADCs generated at pH 6.

| Antibody | Yield | DAR | % Monomer | Concentration (mg/mL ADC) | Success |
|----------|-------|-----|-----------|---------------------------|---------|
| C1       | 66%   | 5.7 | 91%       | 0.80                      | Y       |
| C2       | 59%   | 4.0 | 96%       | 0.48                      | Y       |
| C3       | 48%   | 3.7 | 94%       | 0.38                      | Y       |
| C4       | 29%   | 3.5 | 95%       | 0.29                      | Y       |
| C5       | 38%   | 4.0 | 91%       | 0.27                      | Y       |
| C6       | 34%   | 4.3 | 96%       | 0.25                      | Y       |
| C7       | 38%   | 4.5 | 96%       | 0.24                      | Y       |
| C8       | 30%   | 4.9 | 95%       | 0.24                      | Y       |
| C9       | 37%   | 5.2 | 93%       | 0.23                      | Y       |
| C10      | 23%   | 3.2 | 93%       | 0.20                      | Y       |
| C11      | 23%   | 5.1 | 95%       | 0.16                      | Y       |
| C12      | 18%   | 3.9 | 94%       | 0.16                      | Y       |
| C13      | 16%   | 6.0 | 94%       | 0.15                      | Y       |
| C14      | 17%   | 4.0 | 94%       | 0.15                      | Y       |
| C15      | 17%   | 3.3 | 90%       | 0.15                      | Y       |
| C16      | 15%   | 4.1 | 95%       | 0.14                      | Y       |
| C17      | 14%   | 4.8 | 94%       | 0.14                      | Y       |
| C18      | 16%   | 3.2 | 91%       | 0.14                      | Y       |
| C19      | 17%   | 3.4 | 93%       | 0.13                      | Y       |
| C20      | 17%   | 4.7 | 91%       | 0.12                      | Y       |
| C21      | 22%   | 5.0 | 91%       | 0.12                      | Y       |
| C22      | 19%   | 3.8 | 92%       | 0.12                      | Y       |
| C23      | 25%   | 5.7 | 93%       | 0.11                      | Y       |
| C24      | 19%   | 5.6 | 92%       | 0.10                      | Y       |
| C25      | 7%    | 4.9 | 84%       | 0.03                      | N       |
| C26      | 30%   | 0.9 | 97%       | 0.38                      | N       |
| C27      | 9%    | 4.8 | 89%       | 0.04                      | N       |
| C28      | 34%   | 3.0 | 95%       | 0.28                      | N       |
| C29      | 57%   | 2.7 | 88%       | 0.41                      | N       |
| C30      | 9%    | 5.2 | 84%       | 0.04                      | N       |
| C31      | 11%   | 5.6 | 92%       | 0.05                      | N       |
| C32      | 48%   | 1.9 | 95%       | 0.39                      | N       |
| C33      | 9%    | 5.4 | 84%       | 0.04                      | N       |

|     |     |     |     |      |   |
|-----|-----|-----|-----|------|---|
| C34 | 5%  | 5.5 | 91% | 0.04 | N |
| C35 | 6%  | 4.9 | 81% | 0.02 | N |
| C36 | 12% | 3.9 | 92% | 0.08 | N |
| C36 | 12% | 5.3 | 90% | 0.07 | N |
| C37 | 16% | 5.6 | 91% | 0.09 | N |
| C38 | 5%  | 5.3 | 83% | 0.04 | N |
| C39 | 5%  | 6.0 | 79% | 0.03 | N |
| C40 | 12% | 6.5 | 87% | 0.06 | N |
| C41 | 8%  | 4.9 | 92% | 0.06 | N |
| C42 | 7%  | 6.8 | 89% | 0.04 | N |
| C43 | 5%  | 4.1 | 84% | 0.03 | N |
| C44 | 15% | 5.8 | 93% | 0.09 | N |
| C44 | 1%  | 5.4 | 41% | 0.01 | N |
| C45 | 6%  | 4.4 | 89% | 0.05 | N |
| C46 | 8%  | 4.8 | 88% | 0.04 | N |
| C47 | 0%  | ND  | 74% | 0.00 | N |
| C48 | 4%  | 6.1 | 80% | 0.03 | N |
| C49 | 8%  | 5.0 | 91% | 0.05 | N |
| C50 | 11% | 3.4 | 93% | 0.09 | N |
| C51 | 14% | 4.9 | 91% | 0.08 | N |
| C52 | 12% | 6.4 | 92% | 0.06 | N |
| C53 | 12% | 4.0 | 89% | 0.08 | N |
| C55 | 9%  | 3.5 | 90% | 0.06 | N |
| C56 | 9%  | 4.3 | 88% | 0.06 | N |
| C57 | 14% | 1.8 | 92% | 0.13 | N |
| C58 | 10% | 3.6 | 86% | 0.05 | N |
| C59 | 7%  | 5.1 | 84% | 0.03 | N |
| C60 | 11% | 5.4 | 89% | 0.06 | N |
| C61 | 6%  | 7.8 | 85% | 0.03 | N |
| C63 | 6%  | 4.2 | 90% | 0.05 | N |
| C64 | 9%  | 4.6 | 88% | 0.05 | N |
| C65 | 3%  | 4.9 | 70% | 0.02 | N |
| C66 | 1%  | 9.9 | 23% | 0.00 | N |
| C67 | 7%  | 5.3 | 85% | 0.03 | N |
| C68 | 11% | 4.5 | 92% | 0.07 | N |
| C69 | 1%  | 5.6 | 52% | 0.01 | N |
| C70 | 6%  | 5.4 | 86% | 0.03 | N |
| C71 | 9%  | 3.0 | 84% | 0.04 | N |
| C72 | 5%  | 4.7 | 82% | 0.03 | N |
| C73 | 7%  | 3.7 | 89% | 0.03 | N |
| C74 | 1%  | 5.9 | 52% | 0.01 | N |

|     |     |      |     |      |   |
|-----|-----|------|-----|------|---|
| C75 | 4%  | 5.0  | 83% | 0.03 | N |
| C76 | 6%  | 4.2  | 86% | 0.05 | N |
| C77 | 0%  | ND   | 11% | 0.00 | N |
| C78 | 3%  | 5.7  | 81% | 0.02 | N |
| C79 | 5%  | 2.9  | 84% | 0.03 | N |
| C80 | 4%  | 4.5  | 97% | 0.02 | N |
| C81 | 1%  | 15.4 | 19% | 0.00 | N |
| C82 | 1%  | 7.8  | 53% | 0.00 | N |
| C83 | 5%  | 4.1  | 85% | 0.03 | N |
| C84 | 6%  | 4.0  | 84% | 0.02 | N |
| C85 | 12% | 5.3  | 92% | 0.07 | N |

**(B)** Characterization data for the entire set of ADCs generated at pH 8.

| Antibody | Yield | DAR | % Monomer | Concentration (mg/mL ADC) | Success |
|----------|-------|-----|-----------|---------------------------|---------|
| C25      | 52%   | 2.3 | 99%       | 0.25                      | Y       |
| C26      | 18%   | 2.4 | 99%       | 0.23                      | Y       |
| C27      | 45%   | 2.0 | 100%      | 0.22                      | Y       |
| C28      | 25%   | 2.5 | 99%       | 0.21                      | Y       |
| C29      | 29%   | 2.5 | 98%       | 0.21                      | Y       |
| C30      | 54%   | 2.5 | 100%      | 0.21                      | Y       |
| C31      | 37%   | 2.2 | 99%       | 0.19                      | Y       |
| C32      | 22%   | 2.4 | 100%      | 0.18                      | Y       |
| C33      | 40%   | 2.2 | 99%       | 0.18                      | Y       |
| C34      | 18%   | 2.3 | 99%       | 0.17                      | Y       |
| C35      | 43%   | 1.9 | 100%      | 0.17                      | Y       |
| C36      | 28%   | 2.1 | 99%       | 0.17                      | Y       |
| C37      | 26%   | 3.1 | 99%       | 0.16                      | Y       |
| C38      | 20%   | 2.2 | 100%      | 0.14                      | Y       |
| C39      | 25%   | 2.4 | 98%       | 0.12                      | Y       |
| C40      | 25%   | 2.7 | 99%       | 0.12                      | Y       |
| C41      | 16%   | 3.4 | 98%       | 0.12                      | Y       |
| C42      | 20%   | 3.5 | 100%      | 0.12                      | Y       |
| C43      | 22%   | 2.7 | 100%      | 0.12                      | Y       |
| C44      | 20%   | 3.3 | 98%       | 0.11                      | Y       |
| C45      | 12%   | 2.0 | 98%       | 0.11                      | Y       |
| C46      | 22%   | 2.6 | 98%       | 0.11                      | Y       |
| C47      | 18%   | 2.9 | 98%       | 0.11                      | Y       |
| C48      | 16%   | 3.3 | 95%       | 0.10                      | Y       |
| C49      | 15%   | 2.4 | 99%       | 0.10                      | Y       |
| C50      | 17%   | 1.9 | 99%       | 0.14                      | N       |
| C51      | 12%   | 2.7 | 99%       | 0.06                      | N       |

|     |     |     |      |      |   |
|-----|-----|-----|------|------|---|
| C52 | 19% | 3.2 | 98%  | 0.10 | N |
| C53 | 11% | 3.3 | 97%  | 0.07 | N |
| C54 | 12% | 3.1 | 100% | 0.09 | N |
| C55 | 11% | 2.3 | 100% | 0.07 | N |
| C56 | 11% | 2.4 | 99%  | 0.07 | N |
| C57 | 1%  | 3.5 | 95%  | 0.01 | N |
| C58 | 11% | 3.1 | 99%  | 0.05 | N |
| C59 | 18% | 2.9 | 99%  | 0.08 | N |
| C60 | 13% | 2.2 | 97%  | 0.06 | N |
| C61 | 14% | 2.9 | 99%  | 0.08 | N |
| C62 | 4%  | 2.7 | 100% | 0.03 | N |
| C63 | 14% | 2.4 | 100% | 0.10 | N |
| C64 | 9%  | 1.8 | 99%  | 0.05 | N |
| C65 | 14% | 1.9 | 100% | 0.07 | N |
| C66 | 12% | 2.6 | 100% | 0.07 | N |
| C67 | 13% | 2.3 | 100% | 0.06 | N |
| C68 | 9%  | 2.6 | 99%  | 0.06 | N |
| C69 | 11% | 1.8 | 99%  | 0.06 | N |
| C70 | 14% | 1.2 | 96%  | 0.06 | N |
| C71 | 14% | 2.4 | 100% | 0.06 | N |
| C72 | 9%  | 2.6 | 98%  | 0.05 | N |
| C73 | 9%  | 2.7 | 94%  | 0.05 | N |
| C74 | 8%  | 2.6 | 93%  | 0.04 | N |
| C75 | 5%  | 3.3 | 96%  | 0.04 | N |
| C76 | 5%  | 2.4 | 95%  | 0.03 | N |
| C77 | 8%  | 3.0 | 87%  | 0.03 | N |
| C78 | 5%  | 3.0 | 93%  | 0.03 | N |
| C79 | 5%  | 1.0 | 98%  | 0.03 | N |
| C80 | 4%  | 5.1 | 100% | 0.02 | N |
| C81 | 6%  | 1.9 | 94%  | 0.02 | N |
| C82 | 5%  | 3.4 | 97%  | 0.02 | N |
| C83 | 1%  | 3.2 | 100% | 0.00 | N |
| C84 | 1%  | 3.9 | 100% | 0.00 | N |
| C85 | 0%  | ND  | ND   | 0.00 | N |

(C) Characterization data for the ADCs generated by pooling material from the two rounds (all were assayed).

| Antibody | Yield | DAR | % Monomer | Concentration (mg/mL ADC) |
|----------|-------|-----|-----------|---------------------------|
| C50      | 14%   | 2.3 | 99%       | 0.31                      |
| C51      | 13%   | 3.4 | 98%       | 0.21                      |
| C52      | 16%   | 5.1 | 98%       | 0.16                      |

|     |     |     |      |      |
|-----|-----|-----|------|------|
| C53 | 12% | 3.4 | 97%  | 0.15 |
| C54 | 12% | 2.9 | 100% | 0.11 |
| C55 | 10% | 2.3 | 98%  | 0.10 |
| C56 | 10% | 3.7 | 99%  | 0.10 |
| C57 | 8%  | 2.0 | 99%  | 0.10 |
| C58 | 10% | 4.3 | 97%  | 0.09 |
| C59 | 12% | 3.1 | 98%  | 0.08 |
| C60 | 12% | 2.7 | 96%  | 0.08 |
| C61 | 10% | 4.0 | 97%  | 0.08 |
| C62 | 10% | 4.7 | 99%  | 0.08 |
| C63 | 10% | 2.8 | 99%  | 0.07 |
| C64 | 9%  | 2.7 | 99%  | 0.06 |

**Table S5.** Summary of the Antigen D conjugation campaign. For this campaign, each reaction product was analyzed separately.

| Antibody | Yield | DAR | % Monomer | Concentration (mg/mL ADC) | Success |
|----------|-------|-----|-----------|---------------------------|---------|
| D1       | 29%   | 3.3 | 98        | 0.13                      | Y       |
| D1       | 43%   | 3.1 | 98        | 0.24                      | Y       |
| D1       | 0%    | ND  | ND        | 0.00                      | N       |
| D2       | 57%   | 3.4 | 97        | 0.23                      | Y       |
| D2       | 79%   | 2.6 | 98        | 0.45                      | N       |
| D2       | 15%   | 2.7 | 97        | 0.08                      | N       |
| D2       | 0%    | ND  | ND        | 0.00                      | N       |
| D3       | 34%   | 2.6 | 97        | 0.16                      | N       |
| D3       | 24%   | 2.5 | 97        | 0.13                      | N       |
| D3       | 0%    | ND  | ND        | 0.00                      | N       |
| D3       | 11%   | 3.5 | 97        | 0.05                      | N       |
| D3       | 4%    | 3.8 | 96        | 0.02                      | N       |
| D3       | 0%    | 3.6 | 88        | 0.00                      | N       |
| D4       | 14%   | 3.4 | 96        | 0.06                      | N       |
| D4       | 7%    | 3.8 | 95        | 0.02                      | N       |
| D4       | 3%    | 4.1 | 91        | 0.01                      | N       |
| D4       | 0%    | 4.6 | 90        | 0.00                      | N       |
| D4       | 0%    | ND  | ND        | 0.00                      | N       |
| D4       | 8%    | 4.5 | 93        | 0.03                      | N       |
| D5       | 64%   | 3.4 | 94        | 0.24                      | Y       |
| D5       | 81%   | 2.7 | 94        | 0.33                      | N       |
| D5       | 41%   | 2.7 | 94        | 0.21                      | N       |
| D5       | 5%    | 3.4 | 85        | 0.03                      | N       |
| D5       | 11%   | 3.5 | 95        | 0.06                      | N       |
| D5       | 16%   | 4.0 | 92        | 0.06                      | N       |

|     |     |     |    |      |   |
|-----|-----|-----|----|------|---|
| D6  | 59% | 3.2 | 98 | 0.30 | Y |
| D6  | 0%  | ND  | ND | 0.00 | N |
| D6  | 53% | 2.4 | 98 | 0.37 | N |
| D6  | 0%  | 2.6 | 95 | 0.00 | N |
| D6  | 9%  | 3.3 | 98 | 0.05 | N |
| D6  | 0%  | ND  | ND | 0.00 | N |
| D7  | 72% | 3.7 | 97 | 0.32 | Y |
| D7  | 7%  | 4.3 | 94 | 0.06 | N |
| D7  | 4%  | 4.6 | 93 | 0.02 | N |
| D7  | 1%  | 5.8 | 93 | 0.01 | N |
| D7  | 13% | 4.5 | 97 | 0.07 | N |
| D7  | 64% | 4.4 | 95 | 0.24 | N |
| D8  | 41% | 3.4 | 97 | 0.22 | Y |
| D8  | 29% | 3.3 | 97 | 0.15 | Y |
| D8  | 74% | 2.0 | 97 | 0.40 | N |
| D8  | 87% | 2.4 | 97 | 0.50 | N |
| D8  | 58% | 2.3 | 97 | 0.27 | N |
| D8  | 17% | 2.9 | 97 | 0.10 | N |
| D9  | 66% | 3.7 | 98 | 0.57 | Y |
| D9  | 77% | 3.5 | 98 | 0.47 | Y |
| D9  | 90% | 2.8 | 98 | 0.40 | N |
| D9  | 41% | 2.7 | 98 | 0.22 | N |
| D9  | 42% | 2.6 | 98 | 0.20 | N |
| D9  | 12% | 3.9 | 98 | 0.06 | N |
| D10 | 59% | 3.7 | 95 | 0.20 | Y |
| D10 | 59% | 3.8 | 94 | 0.24 | Y |
| D10 | 0%  | ND  | ND | 0.00 | N |
| D10 | 64% | 2.9 | 94 | 0.27 | N |
| D10 | 19% | 3.3 | 90 | 0.09 | N |
| D10 | 16% | 3.7 | 93 | 0.08 | N |
| D11 | 47% | 3.1 | 97 | 0.31 | Y |
| D11 | 63% | 3.5 | 97 | 0.26 | Y |
| D11 | 30% | 2.8 | 97 | 0.15 | N |
| D11 | 3%  | 3.7 | 95 | 0.02 | N |
| D11 | 0%  | ND  | ND | 0.00 | N |
| D11 | 0%  | ND  | ND | 0.00 | N |
| D12 | 59% | 3.1 | 96 | 0.32 | Y |
| D12 | 50% | 3.8 | 95 | 0.20 | Y |
| D12 | 0%  | ND  | ND | 0.00 | N |
| D12 | 52% | 2.9 | 97 | 0.21 | N |
| D12 | 12% | 3.7 | 94 | 0.06 | N |



|     |     |     |    |      |   |
|-----|-----|-----|----|------|---|
| D12 | 18% | 3.4 | 96 | 0.09 | N |
| D13 | 76% | 3.6 | 96 | 0.28 | Y |
| D13 | 54% | 3.9 | 96 | 0.20 | Y |
| D13 | 34% | 2.9 | 95 | 0.17 | N |
| D13 | 5%  | 3.4 | 94 | 0.03 | N |
| D13 | 0%  | ND  | ND | 0.00 | N |
| D13 | 0%  | ND  | ND | 0.00 | N |
| D14 | 64% | 3.3 | 94 | 0.32 | Y |
| D14 | 89% | 3.3 | 93 | 0.34 | Y |
| D14 | 10% | 3.7 | 91 | 0.05 | N |
| D14 | 0%  | ND  | ND | 0.00 | N |
| D14 | 89% | 4.3 | 95 | 0.38 | N |
| D14 | 16% | 4.4 | 93 | 0.07 | N |
| D15 | 71% | 3.2 | 96 | 0.33 | Y |
| D15 | 68% | 3.8 | 95 | 0.32 | Y |
| D15 | 0%  | ND  | ND | 0.00 | N |
| D15 | 3%  | 3.5 | 93 | 0.02 | N |
| D15 | 18% | 4.4 | 96 | 0.09 | N |
| D15 | 0%  | ND  | ND | 0.00 | N |
| D16 | 75% | 3.1 | 97 | 0.37 | Y |
| D16 | 92% | 3.2 | 97 | 0.36 | Y |
| D16 | 73% | 3.1 | 96 | 0.36 | Y |
| D16 | 62% | 2.4 | 97 | 0.36 | N |
| D16 | 88% | 2.3 | 97 | 0.38 | N |
| D16 | 88% | 2.4 | 97 | 0.43 | N |
| D17 | 82% | 3.4 | 95 | 0.34 | Y |
| D17 | 48% | 3.7 | 95 | 0.20 | Y |
| D17 | 74% | 3.4 | 95 | 0.28 | Y |
| D17 | 78% | 4.0 | 95 | 0.29 | Y |
| D17 | 0%  | ND  | ND | 0.00 | N |
| D17 | 47% | 4.1 | 94 | 0.17 | N |
